# Supplementary material
Source: publisher site journal article supplement (https://www.dovepress.com/article/453875)
Supplement: Supplementary file 1 [file get_supplementary_file.php]

**Annex 1**

Questionnaire

How long have you been doing triathlon?

Have you ever participated in sprint distance triathlon competitions (750m/20km/5km)? If yes, how many?

Have you ever participated in Olympic distance triathlon competitions (1500m/40km/10km)? If yes, how many?

Have you ever participated in 70.3 Ironman distance triathlon competitions (1900m/90km/21km)? If yes, how many?

Have you ever participated in Ironman full distance triathlon competitions (3800m/180km/42km)? If yes, how many?

How many hours a week do you train for running?

How many hours a week do you train for swimming?

How many hours a week do you train for cycling?

How many hours a week do you perform strength training?

What is your target competition of this period?

Did you withdrawal from athletics during this period?

Do you have any chronic disease?

Do you take any ongoing medicine?
